# Supplementary material for: Admission High-Sensitive Cardiac Troponin T Level Increase Is Independently Associated with Higher Mortality in Critically Ill Patients with COVID-19: A Multicenter Study
Source: PubMed Central journal article supplement (PMC8070238; doi:10.3390/jcm10081656), 2021-04-13
Supplement: jcm-10-01656-s001.pdf [file jcm-10-01656-s001.pdf]

## Supplementary Materials

**Table 1.** Echocardiographic evaluation in 66 patients with critical COVID-19.

|                                           | Total (n = 66)  | Normal Cardiac Function (n = 51) | Cardiac Dysfunction (n = 15) | p-Value |
|-------------------------------------------|-----------------|----------------------------------|------------------------------|---------|
| LVEF <sup>1</sup> (%), median [IQR]       | 60 [50–60]      | 60 [55–60]                       | 45 [37.5–50]                 | -       |
| TAPSE <sup>2</sup> (mm), median [IQR]     | 18 [16–22]      | 19 [17–22]                       | 13.5 [12–20]                 | 0.02    |
| hs-cTnT <sup>3</sup> (ng/L), median [IQR] | 14.7 [9.7–30.0] | 13.4 [8.2–29.8]                  | 17.9 [13.4–56.9]             | 0.12    |
| Death, n (%)                              | 18 (27.3%)      | 13 (25.5%)                       | 5 (33.3%)                    | 0.55    |

<sup>1</sup> LVEF: left ventricular ejection fraction, <sup>2</sup> TAPSE: tricuspid annular plane systolic excursion, <sup>3</sup> hs-cTnT: high-sensitive cardiac troponin T.

**Table 2.** Risk factors associated with the need for mechanical ventilation in critically ill COVID-19 patients.

|                                    | Univariate Analysis<br>Hazard Ratio (IC 95%) | p-Value | Multivariable Analysis<br>Hazard Ratio (IC 95%) | p-Value |
|------------------------------------|----------------------------------------------|---------|-------------------------------------------------|---------|
| Age                                | 1 (1–1)                                      | 0.04    | 1.01 (0.98–1.05)                                | 0.47    |
| Male sex                           | 0.97 (0.58–1.6)                              | 0.89    |                                                 |         |
| BMI <sup>1</sup>                   | 1 (0.99–1.1)                                 | 0.17    | 1.02 (0.98–1.07)                                | 0.25    |
| Smokers                            | 1.6 (0.57–4.4)                               | 0.38    |                                                 |         |
| Charlson index                     | 3.2 (1.2–8.6)                                | 0.02    | 0.68 (0.11–4.14)                                | 0.68    |
| SAPS II <sup>2</sup>               | 8.4 (2.4–29)                                 | <0.001  | 5.20 (1.24–21.83)                               | 0.02    |
| PaO <sub>2</sub> /FiO <sub>2</sub> | 1 (0.99–1)                                   | 0.01    | 1.003 (0.99–1)                                  | 0.08    |
| Norepinephrine (>1µg/kg/min)       | 1.9 (1.2–3)                                  | 0.007   | 1.47 (0.90–2.40)                                | 0.12    |
| Renal replacement therapy          | 1.2 (0.68–2.2)                               | 0.51    |                                                 |         |
| Creatininemia                      | 1.3 (0.46–3.4)                               | 0.66    |                                                 |         |
| Hs-cTnT <sup>3</sup>               | 1.9 (1.1–3.3)                                | 0.02    | 1.51 (0.71–3.19)                                | 0.29    |
| CRP <sup>4</sup>                   | 1.8 (0.8–4.1)                                | 0.16    | 1.36 (0.61–3.02)                                | 0.45    |
| PCT <sup>5</sup>                   | 1.1 (0.75–1.7)                               | 0.59    |                                                 |         |
| Lactatemia                         | 2 (0.4–9.7)                                  | 0.41    |                                                 |         |
| D-dimer                            | 1.7 (0.76–3.6)                               | 0.20    |                                                 |         |

<sup>1</sup> BMI: Body Mass Index, <sup>2</sup> SAPS II: Simplified Acute Physiology Score II, <sup>3</sup> hs-cTnT: high-sensitive cardiac troponin T, <sup>4</sup> CRP: C reactive protein, <sup>5</sup> PCT: procalcitonin
